# Supplementary material for: Genome-wide methylation and transcriptome analysis in penile carcinoma: uncovering new molecular markers
Source: PubMed Central journal article supplement (PMC4407795; doi:10.1186/s13148-015-0082-4), 2015-04-18
Supplement: 13148_2015_82_MOESM2_ESM.pdf [file 13148_2015_82_MOESM2_ESM.pdf]

**Table S1.** List of hypermethylated probes. ID for NCBI access, probe ID of the altered probe, FDR, fold-change and chromosome position.

| <i>Symbol</i>   | <i>Gene ID</i> | <i>ProbeID</i> | <i>FDR</i> | <i>Fold Change</i> | <i>MapLocation</i>       | <i>Gene function</i>                  |
|-----------------|----------------|----------------|------------|--------------------|--------------------------|---------------------------------------|
| <i>ABCC9</i>    | 10060          | A_17_P08238636 | 0.036      | 2.3                | chr12:21985847-21985891  | Ion channel                           |
| <i>ACTA1</i>    | 58             | A_17_P15190055 | 0.036      | 2.0                | chr1:227636359-227636403 | Ion channel                           |
| <i>ADCY8</i>    | 114            | A_17_P26758093 | 0.036      | 2.6                | chr8:132122607-132122652 | Enzyme                                |
|                 |                | A_17_P06475866 | 0.045      | 2.1                | chr8:132121709-132121753 |                                       |
|                 |                | A_17_P06475878 | 0.045      | 2.4                | chr8:132123367-132123411 |                                       |
| <i>ATP4A</i>    | 495            | A_17_P10948156 | 0.05       | 1.9                | chr19:40740788-40740833  | Transporter                           |
| <i>BARHL1</i>   | 56751          | A_17_P27338364 | 0.039      | 2.1                | chr9:134446538-134446582 | Homeodomain protein/transcript factor |
| <i>BARHL2</i>   | 343472         | A_17_P20400537 | 0.046      | 1.8                | chr1:90954618-90954662   | Homeodomain protein/transcript factor |
| <i>BARX1</i>    | 56033          | A_17_P16242168 | 0.044      | 2.1                | chr9:95750945-95750989   | Homeodomain protein/transcript factor |
| <i>BDNF</i>     | 627            | A_17_P07712649 | 0.039      | 2.0                | chr11:27700398-27700442  | Cytokine and growth factor            |
|                 |                | A_17_P07712647 | 0.039      | 2.0                | chr11:27700255-27700309  |                                       |
| <i>C14orf39</i> | 317761         | A_17_P16707753 | 0.049      | 1.9                | chr14:60022277-60022321  | Other                                 |
| <i>C1orf114</i> | 57821          | A_17_P00585874 | 0.036      | 2.0                | chr1:167663430-167663482 | Other                                 |
|                 |                | A_17_P00585873 | 0.047      | 2.0                | chr1:167663319-167663366 | Other                                 |
| <i>C20orf56</i> | 140828         | A_17_P11115750 | 0.036      | 2.3                | chr20:22505444-22505502  | Other                                 |
|                 |                | A_17_P31759553 | 0.041      | 1.9                | chr20:22507830-22507876  |                                       |
| <i>CACNG3</i>   | 10368          | A_17_P16869900 | 0.036      | 2.0                | chr16:24174578-24174622  | Ion channel                           |
| <i>CACNG7</i>   | 59284          | A_17_P10998631 | 0.038      | 2.1                | chr19:59137279-59137323  | Ion channel                           |
| <i>CACNG8</i>   | 59283          | A_17_P10998740 | 0.036      | 2.2                | chr19:59175408-59175452  | Ion channel                           |
| <i>CALCA</i>    | 796            | A_17_P07656161 | 0.048      | 1.9                | chr11:14951845-14951889  | Cytokine and growth factor            |
| <i>CDX2</i>     | 1045           | A_17_P08741209 | 0.044      | 1.9                | chr13:27439498-27439557  | Homeodomain protein/transcript factor |
| <i>CNTNAP5</i>  | 129684         | A_17_P21569681 | 0.038      | 2.4                | chr2:124498973-124499023 | Other                                 |
|                 |                | A_17_P15318263 | 0.047      | 1.9                | chr2:124499051-124499107 |                                       |
| <i>COL14A1</i>  | 7373           | A_17_P06427847 | 0.038      | 2.0                | chr8:121206780-121206825 | Other                                 |
|                 |                | A_17_P16130592 | 0.045      | 2.1                | chr8:121206852-121206896 | Other                                 |
| <i>CRISPLD1</i> | 83690          | A_17_P06221585 | 0.036      | 2.2                | chr8:76059263-76059307   | Other                                 |

Cont.

| <i>Symbol</i>       | <i>Gene ID</i> | <i>UniqueID</i> | <i>FDR</i> | <i>Fold change</i> | <i>MapLocation</i>        | <i>Gene function</i>                 |
|---------------------|----------------|-----------------|------------|--------------------|---------------------------|--------------------------------------|
| <i>CSMD3</i>        | 114788         | A_17_P06395993  | 0.036      | 2.2                | chr8:114514964-114515008  |                                      |
|                     |                | A_17_P06395991  | 0.043      | 1.8                | chr8:114514801-114514845  | Enzyme                               |
|                     |                | A_17_P26678353  | 0.049      | 2.1                | chr8:114518098-114518157  |                                      |
| <i>DBX1</i>         | 120237         | A_17_P07680059  | 0.036      | 2.3                | chr11:20138642-20138698   | Homeodomin protein/transcript factor |
|                     |                | A_17_P07680061  | 0.047      | 1.9                | chr11:20138810-20138854   |                                      |
| <i>DGKG</i>         | 1608           | A_17_P15520017  | 0.047      | 1.9                | chr3:187561933-187561977  | Protein kinase                       |
| <i>DKFZP434H168</i> | 26077          | A_17_P16899074  | 0.044      | 2.1                | chr16:54785433-54785485   | Other                                |
| <i>DLX6</i>         | 1750           | A_17_P15991490  | 0.046      | 2.0                | chr7:96465142-96465186    | Homeodomin protein/transcript factor |
| <i>DOK5</i>         | 55816          | A_17_P11222263  | 0.036      | 2.2                | chr20:52526358-52526402   | Other                                |
| <i>EN2</i>          | 2020           | A_17_P05887712  | 0.04       | 2.0                | chr7:154937070-154937114  | Homeodomin protein/transcript factor |
| <i>EPHA7</i>        | 2045           | A_17_P04903793  | 0.049      | 2.1                | chr6:94184190-94184234    | Protein kinase                       |
| <i>EVX2</i>         | 344191         | A_17_P01695014  | 0.039      | 2.0                | chr2:176658067-176658119  | Homeodomin protein/transcript factor |
|                     |                | A_17_P01695013  | 0.045      | 2.0                | chr2:176657948-176658006  |                                      |
| <i>FAM150A</i>      | 389658         | A_17_P16094843  | 0.048      | 1.9                | chr8:53640046-53640097    | Other                                |
| <i>FOXB2</i>        | 442425         | A_17_P27091196  | 0.047      | 2.1                | chr9:78826240-78826295    | Transcript factor                    |
| <i>FOXC2</i>        | 2303           | A_17_P10170658  | 0.047      | 2.0                | chr16:85157228-85157274   | Transcript factor                    |
| <i>GAD1</i>         | 2571           | A_17_P21794121  | 0.036      | 2.3                | chr2:171378696-171378743  | Enzyme                               |
|                     |                | A_17_P21794195  | 0.045      | 2.0                | chr2:171387447-171387498  |                                      |
| <i>GDF6</i>         | 392255         | A_17_P06316227  | 0.044      | 2.1                | chr8:97226850-97226903    |                                      |
|                     |                | A_17_P06316316  | 0.047      | 2.0                | chr8:97238934-97238978    | Citokine and growth factor           |
|                     |                | A_17_P06316318  | 0.047      | 2.2                | chr8:97239280-97239333    |                                      |
| <i>GPR139</i>       | 124274         | A_17_P09952877  | 0.05       | 1.8                | chr16:19993075-19993123   | G-protein coupled receptor           |
| <i>HCRTR2</i>       | 3062           | A_17_P04752213  | 0.047      | 2.0                | chr6:55147181-55147228    | G-protein coupled receptor           |
| <i>HDX</i>          | 139324         | A_17_P11808937  | 0.049      | 1.8                | chrX:83643928-83643972    | Other                                |
| <i>HMX2</i>         | 3167           | A_17_P07539294  | 0.045      | 1.9                | chr10:124893115-124893159 | Homeodomin protein/transcript factor |
| <i>KCNA4</i>        | 3739           | A_17_P28123519  | 0.036      | 2.1                | chr11:29994227-29994279   |                                      |
|                     |                | A_17_P07722804  | 0.036      | 2.2                | chr11:29994350-29994401   | Ion channel                          |

Cont.

| <i>Symbol</i>   | <i>Gene ID</i> | <i>UniqueID</i> | <i>FDR</i> | <i>Fold change</i> | <i>MapLocation</i>        | <i>Gene function</i>                  |
|-----------------|----------------|-----------------|------------|--------------------|---------------------------|---------------------------------------|
| <i>KCNV1</i>    | 27012          | A_17_P06380055  | 0.047      | 1.9                | chr8:111056151-111056195  | Ion channel                           |
| <i>LHX2</i>     | 9355           | A_17_P06954369  | 0.045      | 2.0                | chr9:125818993-125819038  | Homeodomain protein/transcript factor |
| <i>LHX5</i>     | 64211          | A_17_P29058043  | 0.036      | 2.1                | chr12:112386029-112386073 | Homeodomain protein/transcript factor |
| <i>LHX8</i>     | 431707         | A_17_P00299472  | 0.047      | 1.8                | chr1:75368569-75368615    | Homeodomain protein/transcript factor |
| <i>LRAT</i>     | 9227           | A_17_P03544555  | 0.036      | 2.0                | chr4:155883760-155883804  | Enzyme                                |
| <i>LRP1B</i>    | 53353          | A_17_P01528538  | 0.047      | 1.8                | chr2:142604347-142604400  | Transmembrane receptor                |
| <i>LRRC4C</i>   | 57689          | A_17_P28170279  | 0.036      | 2.4                | chr11:40271359-40271405   | Other                                 |
| <i>MEOX2</i>    | 4223           | A_17_P05323186  | 0.044      | 2.0                | chr7:15693422-15693466    | Homeodomain protein/transcript factor |
| <i>MGC45800</i> | 90768          | A_17_P15644051  | 0.047      | 2.6                | chr4:183300448-183300492  | Other                                 |
| <i>MOS</i>      | 4342           | A_17_P06135989  | 0.047      | 2.3                | chr8:57188271-57188323    | Protein kinase                        |
| <i>MSX1</i>     | 4487           | A_17_P02902305  | 0.046      | 2.0                | chr4:4910130-4910178      | Homeodomain protein/transcript factor |
| <i>NID2</i>     | 22795          | A_17_P29750410  | 0.038      | 2.0                | chr14:51604752-51604796   | Other                                 |
| <i>NKX2-2</i>   | 4821           | A_17_P11110586  | 0.036      | 2.3                | chr20:21438392-21438439   |                                       |
|                 |                | A_17_P11110666  | 0.036      | 2.1                | chr20:21449874-21449918   |                                       |
|                 |                | A_17_P11110672  | 0.037      | 2.2                | chr20:21451830-21451882   | Homeodomain protein/transcript factor |
|                 |                | A_17_P17179057  | 0.039      | 2.1                | chr20:21449497-21449541   |                                       |
|                 |                | A_17_P11110620  | 0.04       | 1.9                | chr20:21443698-21443742   |                                       |
|                 |                | A_17_P11110664  | 0.044      | 2.1                | chr20:21449392-21449451   |                                       |
| <i>NKX3-2</i>   | 579            | A_17_P02936292  | 0.045      | 2.0                | chr4:13150778-13150825    | Homeodomain protein/transcript factor |
| <i>NLGN1</i>    | 22871          | A_17_P02775610  | 0.036      | 2.3                | chr3:174785418-174785467  |                                       |
|                 |                | A_17_P02775615  | 0.045      | 2.0                | chr3:174785829-174785875  | Enzyme                                |
| <i>NOVA1</i>    | 4857           | A_17_P09182545  | 0.036      | 2.2                | chr14:26137697-26137744   | Other                                 |
| <i>NPHS1</i>    | 4868           | A_17_P17134237  | 0.045      | 1.9                | chr19:41027056-41027100   | Other                                 |
| <i>NRK</i>      | 203447         | A_17_P11866457  | 0.047      | 1.8                | chrX:104953217-104953261  | Protein kinase                        |
| <i>NXPH1</i>    | 30010          | A_17_P25505781  | 0.036      | 2.1                | chr7:8450275-8450327      |                                       |
|                 |                | A_17_P05288557  | 0.036      | 2.0                | chr7:8449923-8449967      | Other                                 |
| <i>OLIG2</i>    | 10215          | A_17_P17231917  | 0.047      | 2.0                | chr21:33319865-33319909   | Transcript factor                     |

Cont.

| <i>Symbol</i>  | <i>Gene ID</i> | <i>UniqueID</i> | <i>FDR</i> | <i>Fold change</i> | <i>MapLocation</i>        | <i>Gene function</i>                 |
|----------------|----------------|-----------------|------------|--------------------|---------------------------|--------------------------------------|
| <i>ONECUT1</i> | 3175           | A_17_P09659699  | 0.049      | 1.8                | chr15:50874085-50874129   | Homeodomin protein/transcript factor |
| <i>ONECUT2</i> | 9480           | A_17_P10736367  | 0.044      | 2.0                | chr18:53257093-53257144   | Homeodomin protein/transcript factor |
| <i>OTX2</i>    | 5015           | A_17_P29772123  | 0.036      | 2.1                | chr14:56348893-56348940   | Homeodomin protein/transcript factor |
| <i>PARP15</i>  | 165631         | A_17_P02548080  | 0.05       | 2.2                | chr3:123779262-123779306  | Other                                |
| <i>PAX7</i>    | 5081           | A_17_P15033933  | 0.036      | 2.1                | chr1:18832427-18832476    | Homeodomin protein/transcript factor |
| <i>PCDH17</i>  | 27253          | A_17_P08876699  | 0.036      | 2.3                | chr13:57103840-57103889   | Other                                |
|                |                | A_17_P08876698  | 0.041      | 2.0                | chr13:57103674-57103726   | Other                                |
| <i>PCSK1</i>   | 5122           | A_17_P04124108  | 0.045      | 2.0                | chr5:95794765-95794816    | Peptidase                            |
| <i>PDE4B</i>   | 5142           | A_17_P00258089  | 0.05       | 1.9                | chr1:66031654-66031698    | Enzyme                               |
| <i>PDGFRA</i>  | 5156           | A_17_P23258860  | 0.044      | 1.9                | chr4:54793027-54793082    | Citokine and growth factor           |
| <i>PRDM14</i>  | 63978          | A_17_P26482035  | 0.043      | 2.1                | chr8:71145424-71145468    | Transcript factor                    |
| <i>PRHOXNB</i> | 646625         | A_17_P08741289  | 0.045      | 2.1                | chr13:27450864-27450908   | Enzyme                               |
| <i>PUS3</i>    | 83480          | A_17_P08097861  | 0.036      | 2.1                | chr11:125278869-125278924 | Enzyme                               |
| <i>RAB3C</i>   | 115827         | A_17_P03953335  | 0.045      | 2.1                | chr5:57915223-57915275    | Enzyme                               |
|                |                | A_17_P03953334  | 0.047      | 2.0                | chr5:57915151-57915201    | Enzyme                               |
| <i>RASGRF1</i> | 5923           | A_17_P09777987  | 0.038      | 2.1                | chr15:77169713-77169757   | Other                                |
| <i>RFX4</i>    | 5992           | A_17_P08596300  | 0.041      | 1.9                | chr12:105502893-105502940 | Transcript factor                    |
| <i>RGS20</i>   | 8601           | A_17_P06126588  | 0.045      | 2.0                | chr8:54952819-54952870    | Other                                |
| <i>RGS6</i>    | 9628           | A_17_P09380532  | 0.044      | 2.0                | chr14:71469728-71469776   | Enzyme                               |
|                |                | A_17_P29840048  | 0.049      | 2.0                | chr14:71469890-71469934   | Enzyme                               |
| <i>RORB</i>    | 6096           | A_17_P06741116  | 0.039      | 2.2                | chr9:76304689-76304738    | Transcript factor                    |
|                |                | A_17_P06741115  | 0.044      | 1.9                | chr9:76304615-76304663    | Transcript factor                    |
| <i>RSPO2</i>   | 340419         | A_17_P26653858  | 0.036      | 2.5                | chr8:109165110-109165154  | Receptor Binding                     |
|                |                | A_17_P06371131  | 0.036      | 2.2                | chr8:109164379-109164429  | Receptor Binding                     |
|                |                | A_17_P26653843  | 0.041      | 2.1                | chr8:109163335-109163388  | Receptor Binding                     |
| <i>SCG3</i>    | 29106          | A_17_P30147107  | 0.036      | 2.1                | chr15:49761061-49761105   | Other                                |

Cont.

| <i>Symbol</i>     | <i>Gene ID</i> | <i>UniqueID</i> | <i>FDR</i> | <i>Fold change</i> | <i>MapLocation</i>       | <i>Gene function</i>       |
|-------------------|----------------|-----------------|------------|--------------------|--------------------------|----------------------------|
| <i>SFTA3</i>      | 253970         | A_17_P09227023  | 0.036      | 2.3                | chr14:36053145-36053189  |                            |
|                   |                | A_17_P09227024  | 0.036      | 2.2                | chr14:36053271-36053320  | Other                      |
|                   |                | A_17_P09227026  | 0.044      | 2.0                | chr14:36053489-36053543  |                            |
| <i>SLC24A2</i>    | 25769          | A_17_P09227026  | 0.044      | 2.0                | chr14:36053489-36053543  | Transporter                |
| <i>SLC32A1</i>    | 140679         | A_17_P11157911  | 0.036      | 2.0                | chr20:36788766-36788811  |                            |
|                   |                | A_17_P11157908  | 0.036      | 2.0                | chr20:36788577-36788624  | Transporter                |
|                   |                | A_17_P11157930  | 0.043      | 2.0                | chr20:36791055-36791101  |                            |
|                   |                | A_17_P11157916  | 0.044      | 1.9                | chr20:36789240-36789284  |                            |
| <i>SLITRK3</i>    | 22865          | A_17_P02736025  | 0.036      | 2.2                | chr3:166396056-166396100 |                            |
|                   |                | A_17_P22876066  | 0.044      | 2.0                | chr3:166395829-166395874 | Other                      |
|                   |                | A_17_P22876069  | 0.049      | 2.0                | chr3:166396212-166396266 |                            |
| <i>SLITRK5</i>    | 26050          | A_17_P09018898  | 0.036      | 2.2                | chr13:87123799-87123852  |                            |
|                   |                | A_17_P09018901  | 0.036      | 2.0                | chr13:87124098-87124154  | Other                      |
|                   |                | A_17_P09018899  | 0.049      | 1.9                | chr13:87123916-87123964  |                            |
| <i>SNTG1</i>      | 54212          | A_17_P16093546  | 0.047      | 2.2                | chr8:50985855-50985908   | Other                      |
| <i>SOX14</i>      | 8403           | A_17_P22753722  | 0.034      | 2.4                | chr3:138963224-138963270 | Transcript factor          |
| <i>SOX17</i>      | 64321          | A_17_P26412159  | 0.041      | 2.0                | chr8:55528683-55528729   | Transcript factor          |
| <i>SOX2OT</i>     | 347689         | A_17_P02813547  | 0.038      | 2.1                | chr3:182928302-182928361 | Transcript factor          |
| <i>SOX3</i>       | 6658           | A_17_P11991249  | 0.044      | 1.8                | chrX:139416332-139416378 | Transcript factor          |
| <i>SSTR1</i>      | 6751           | A_17_P09235148  | 0.045      | 2.0                | chr14:37747511-37747555  | G-protein coupled receptor |
| <i>ST6GALNAC5</i> | 81849          | A_17_P00307347  | 0.049      | 1.9                | chr1:77105597-77105656   | Enzyme                     |
| <i>STMN2</i>      | 11075          | A_17_P06243029  | 0.037      | 2.1                | chr8:80686506-80686553   | Other                      |
| <i>TBX15</i>      | 6913           | A_17_P00489877  | 0.039      | 2.1                | chr1:119331588-119331632 | Transcript factor          |
| <i>TMEM196</i>    | 256130         | A_17_P05343711  | 0.036      | 2.3                | chr7:19779448-19779492   | Other                      |
| <i>TP53TG5</i>    | 27296          | A_17_P11187276  | 0.049      | 2.0                | chr20:43435925-43435984  | Other                      |
| <i>TWIST1</i>     | 7291           | A_17_P05340624  | 0.034      | 2.3                | chr7:19113600-19113655   |                            |
|                   |                | A_17_P05340626  | 0.036      | 2.4                | chr7:19113800-19113844   | Transcript factor          |
|                   |                | A_17_P05340625  | 0.036      | 2.1                | chr7:19113678-19113723   |                            |

Cont.

| <i>Symbol</i>  | <i>Gene ID</i> | <i>UniqueID</i> | <i>FDR</i> | <i>Fold change</i> | <i>MapLocation</i>       | <i>Gene function</i> |
|----------------|----------------|-----------------|------------|--------------------|--------------------------|----------------------|
| <i>WIT1</i>    | 51352          | A_17_P07734872  | 0.036      | 2.3                | chr11:32414288-32414339  |                      |
|                |                | A_17_P07734871  | 0.036      | 2.0                | chr11:32414223-32414268  |                      |
|                |                | A_17_P07734875  | 0.044      | 2.0                | chr11:32414631-32414675  | Other                |
|                |                | A_17_P07734876  | 0.044      | 2.0                | chr11:32414741-32414789  |                      |
|                |                | A_17_P07734806  | 0.047      | 2.0                | chr11:32405844-32405903  |                      |
| <i>ZFPM2</i>   | 23414          | A_17_P06356935  | 0.039      | 2.1                | chr8:106399422-106399473 | Transcript factor    |
| <i>ZIC1</i>    | 7545           | A_17_P02656334  | 0.047      | 1.9                | chr3:148612404-148612452 | Transcript factor    |
| <i>ZIC4</i>    | 84107          | A_17_P02656172  | 0.047      | 1.9                | chr3:148593204-148593248 | Transcript factor    |
| <i>ZIC5</i>    | 85416          | A_17_P09077784  | 0.036      | 2.0                | chr13:99422842-99422887  | Transcript factor    |
| <i>ZNF347</i>  | 84671          | A_17_P31637802  | 0.039      | 1.9                | chr19:58354104-58354148  | Other                |
| <i>ZNF415</i>  | 55786          | A_17_P10996998  | 0.047      | 1.8                | chr19:58327872-58327916  | Transcript factor    |
|                |                | A_17_P31637698  | 0.047      | 1.9                | chr19:58327806-58327850  |                      |
| <i>ZNF578</i>  | 147660         | A_17_P10996139  | 0.047      | 2.1                | chr19:57648767-57648822  | Other                |
|                |                | A_17_P10996138  | 0.05       | 1.9                | chr19:57648673-57648720  |                      |
| <i>ZNF702P</i> | 79986          | A_17_P10996609  | 0.037      | 1.9                | chr19:58188816-58188860  | Other                |
| <i>ZNF763</i>  | 284390         | A_17_P31500433  | 0.046      | 1.9                | chr19:11937303-11937347  | Other                |
| <i>ZNF793</i>  | 390927         | A_17_P17136071  | 0.036      | 2.3                | chr19:42689868-42689912  | Other                |
| <i>ZSCANI</i>  | 284312         | A_17_P17165786  | 0.039      | 1.9                | chr19:63237712-63237756  | Other                |

**Table S2.** Top 100 differentially expressed genes (under- and overexpressed) in PeCa.

| DOWN-EXPRESSED  |           |                  |           | OVEREXPRESSED   |           |                 |           |
|-----------------|-----------|------------------|-----------|-----------------|-----------|-----------------|-----------|
| <i>GENE</i>     | <i>FC</i> | <i>GENE</i>      | <i>FC</i> | <i>Gene</i>     | <i>FC</i> | <i>GENE</i>     | <i>FC</i> |
| <i>ANGPTL7</i>  | -347.6    | <i>GRIN2A</i>    | -37.2     | <i>MMP12</i>    | 89.91     | <i>ERCC6L</i>   | 13.20     |
| <i>ATP1A2</i>   | -246.4    | <i>NTF3</i>      | -35.8     | <i>MMP10</i>    | 52.53     | <i>BUB1B</i>    | 13.17     |
| <i>FRZB</i>     | -194.5    | <i>PDK4</i>      | -35.7     | <i>IL1B</i>     | 51.42     | <i>CA2</i>      | 13.13     |
| <i>AG2</i>      | -137.7    | <i>CFD</i>       | -35.7     | <i>MMP1</i>     | 51.09     | <i>LAMP3</i>    | 13.10     |
| <i>MYOC</i>     | -137.1    | <i>GALNTL1</i>   | -35.6     | <i>IL1A</i>     | 42.84     | <i>HAS3</i>     | 13.08     |
| <i>CNN1</i>     | -98.9     | <i>MYH11</i>     | -34.9     | <i>CXCL1</i>    | 38.84     | <i>TNF</i>      | 12.89     |
| <i>CPAMD8</i>   | -97.5     | <i>KCNE4</i>     | -34.2     | <i>EREG</i>     | 27.23     | <i>RAD51</i>    | 12.79     |
| <i>CHRD1</i>    | -89.1     | <i>LMOD1</i>     | -34.2     | <i>CASC5</i>    | 26.23     | <i>KRT75</i>    | 12.77     |
| <i>PCDH20</i>   | -89.0     | <i>GPM6A</i>     | -34.1     | <i>AIM2</i>     | 26.07     | <i>CYP27B1</i>  | 12.70     |
| <i>AOC3</i>     | -82.8     | <i>FRY</i>       | -33.6     | <i>RGS20</i>    | 26.02     | <i>LMNB1</i>    | 12.62     |
| <i>MYRIP</i>    | -75.5     | <i>PTCHD1</i>    | -33.5     | <i>APOBEC3A</i> | 24.40     | <i>MUCL1</i>    | 12.45     |
| <i>PCOLCE2</i>  | -70.2     | <i>CNR1</i>      | -33.3     | <i>CTSL2</i>    | 24.28     | <i>TCHH</i>     | 12.36     |
| <i>CILP</i>     | -69.6     | <i>KCNB1</i>     | -33.3     | <i>SKA3</i>     | 23.16     | <i>OVOL1</i>    | 12.34     |
| <i>FAM150B</i>  | -69.6     | <i>ZBTB16</i>    | -33.1     | <i>CEP55</i>    | 23.10     | <i>ASPM</i>     | 12.24     |
| <i>OLFM4</i>    | -66.2     | <i>SCARA5</i>    | -33.0     | <i>NETO2</i>    | 21.82     | <i>OASL</i>     | 12.14     |
| <i>PLCXD3</i>   | -65.5     | <i>NUDT10</i>    | -32.8     | <i>BUB1</i>     | 20.90     | <i>KYNU</i>     | 12.11     |
| <i>VIT</i>      | -64.5     | <i>NLGN1</i>     | -32.7     | <i>E2F7</i>     | 20.72     | <i>TOP2A</i>    | 12.11     |
| <i>ACTG2</i>    | -62.8     | <i>CRLF1</i>     | -31.9     | <i>SLC28A3</i>  | 19.95     | <i>KIF18A</i>   | 12.05     |
| <i>RGS5</i>     | -61.9     | <i>CLEC3B</i>    | -31.4     | <i>EPCAM</i>    | 19.86     | <i>GJB2</i>     | 12.01     |
| <i>EDN3</i>     | -60.3     | <i>TMEM47</i>    | -31.2     | <i>IL12RB2</i>  | 19.78     | <i>KIF20A</i>   | 11.89     |
| <i>RCAN2</i>    | -60.3     | <i>XKR4</i>      | -30.9     | <i>CENPA</i>    | 19.55     | <i>VSNL1</i>    | 11.86     |
| <i>PRDM16</i>   | -59.3     | <i>PRUNE2</i>    | -30.8     | <i>CXCL13</i>   | 19.47     | <i>SERPINB5</i> | 11.85     |
| <i>ADRA1B</i>   | -57.4     | <i>AR</i>        | -30.5     | <i>CKAP2L</i>   | 18.72     | <i>C10RF135</i> | 11.84     |
| <i>PLP1</i>     | -54.0     | <i>BEX1</i>      | -29.7     | <i>KRT16</i>    | 18.68     | <i>UHRF1</i>    | 11.82     |
| <i>SLC17A8</i>  | -52.9     | <i>MAOB</i>      | -29.3     | <i>KIAA0101</i> | 18.38     | <i>FAM64A</i>   | 11.77     |
| <i>ITGA8</i>    | -52.7     | <i>TMOD1</i>     | -29.2     | <i>TTK</i>      | 17.91     | <i>TPX2</i>     | 11.73     |
| <i>LONRF2</i>   | -52.6     | <i>SLITRK4</i>   | -29.1     | <i>KIAA1199</i> | 17.44     | <i>MELK</i>     | 11.68     |
| <i>SYNM</i>     | -52.1     | <i>SRD5A2</i>    | -29.0     | <i>CHEK1</i>    | 17.43     | <i>KRT17</i>    | 11.45     |
| <i>MYOT</i>     | -51.5     | <i>ITIH3</i>     | -29.0     | <i>PKP1</i>     | 16.91     | <i>HMGB3L1</i>  | 11.44     |
| <i>SPARCL1</i>  | -49.8     | <i>RAI2</i>      | -28.4     | <i>MMP9</i>     | 16.88     | <i>MMP7</i>     | 11.38     |
| <i>DES</i>      | -49.7     | <i>HBB</i>       | -28.4     | <i>SHCBP1</i>   | 16.59     | <i>CCNA2</i>    | 11.35     |
| <i>IPO9</i>     | -49.7     | <i>PLCB4</i>     | -28.2     | <i>MAGEA1</i>   | 16.14     | <i>SLC7A11</i>  | 11.07     |
| <i>LPHN3</i>    | -49.6     | <i>THBS4</i>     | -28.0     | <i>NCAPG</i>    | 15.95     | <i>KRT33A</i>   | 10.95     |
| <i>ARHGAP20</i> | -49.3     | <i>MYLK</i>      | -27.5     | <i>IFNE</i>     | 15.77     | <i>NUF2</i>     | 10.93     |
| <i>SCRG1</i>    | -48.8     | <i>CCDC85A</i>   | -27.4     | <i>IL11</i>     | 15.27     | <i>CENPF</i>    | 10.86     |
| <i>CKMT2</i>    | -47.5     | <i>C8ORF22</i>   | -27.2     | <i>BNC1</i>     | 15.12     | <i>MCM10</i>    | 10.85     |
| <i>COL21A1</i>  | -47.4     | <i>PNMT</i>      | -27.2     | <i>IL1F5</i>    | 15.00     | <i>DTL</i>      | 10.82     |
| <i>PDLIM3</i>   | -44.6     | <i>LOC388630</i> | -26.4     | <i>EPGN</i>     | 14.80     | <i>PBK</i>      | 10.81     |
| <i>GNAZ</i>     | -44.2     | <i>PLAC9</i>     | -26.3     | <i>AREG</i>     | 14.35     | <i>CDCA5</i>    | 10.78     |
| <i>ARHGAP6</i>  | -43.6     | <i>FOXF1</i>     | -25.9     | <i>MMP13</i>    | 14.19     | <i>UBE2T</i>    | 10.78     |
| <i>TYRP1</i>    | -42.8     | <i>PKNOX2</i>    | -25.8     | <i>CYP24A1</i>  | 14.18     | <i>GAL</i>      | 10.77     |
| <i>PDZRN4</i>   | -41.6     | <i>C2ORF40</i>   | -25.7     | <i>SPC25</i>    | 14.17     | <i>CDC6</i>     | 10.77     |
| <i>FHL1</i>     | -41.3     | <i>HSPB7</i>     | -25.6     | <i>SPRR2D</i>   | 13.97     | <i>CDCA8</i>    | 10.70     |
| <i>RNF112</i>   | -41.0     | <i>SORBS1</i>    | -25.6     | <i>LCE3D</i>    | 13.93     | <i>CCNB1</i>    | 10.69     |
| <i>PPP1R1A</i>  | -40.7     | <i>C10ORF10</i>  | -25.6     | <i>PPIF</i>     | 13.86     | <i>C19ORF21</i> | 10.69     |
| <i>RERGL</i>    | -40.7     | <i>C8ORF84</i>   | -25.5     | <i>DLGAP5</i>   | 13.62     | <i>FAM111B</i>  | 10.60     |
| <i>PLN</i>      | -39.8     | <i>MAL</i>       | -25.3     | <i>HMMR</i>     | 13.55     | <i>AGMAT</i>    | 10.59     |
| <i>TMEM100</i>  | -39.0     | <i>MAGI2</i>     | -25.1     | <i>CCL20</i>    | 13.50     | <i>TNNT1</i>    | 10.43     |
| <i>PPP1R3C</i>  | -38.7     | <i>FHL5</i>      | -25.1     | <i>CDK1</i>     | 13.41     | <i>B3GNT5</i>   | 10.38     |
| <i>CASQ2</i>    | -38.2     | <i>HSPB2</i>     | -25.0     | <i>FOXMI</i>    | 13.21     | <i>KRT16P3</i>  | 10.35     |

FC – fold change

**Table S3.** Integrative analysis for transcriptome data and methylation profile, according to HPV status.

| Gene             | HPV +           |                  | Gene             | HPV -           |                  |
|------------------|-----------------|------------------|------------------|-----------------|------------------|
|                  | Fold Expression | Fold Methylation |                  | Fold Expression | Fold Methylation |
| <i>PRR16</i>     | -1.29           | 1.71             | <i>ADRA1B</i>    | -1.17           | 1.44             |
| <i>FSCN1</i>     | -1.26           | 1.86             | <i>SMOC1</i>     | -1.21           | 1.53             |
| <i>FZD5</i>      | -1.09           | 1.70             | <i>TNFSF14</i>   | -1.94           | 2.18             |
| <i>TRPM2</i>     | -3.09           | 2.01             | <i>EBF2</i>      | -1.16           | 1.78             |
| <i>HN1</i>       | -1.48           | 1.41             | <i>BLM</i>       | -1.03           | 1.55             |
| <i>PRAME</i>     | -4.90           | 1.70             | <i>TBX3</i>      | -1.18           | 1.82             |
| <i>CD70</i>      | -1.22           | 1.37             | <i>VAC14</i>     | -1.09           | 1.42             |
| <i>PKP3</i>      | -1.21           | 1.72             | <i>PLEKHA4</i>   | -1.08           | 2.09             |
| <i>BCL11B</i>    | -1.51           | 1.77             | <i>MMP9</i>      | -1.61           | 1.82             |
| <i>TERT</i>      | -1.08           | 1.65             | <i>NOG</i>       | -1.04           | 1.80             |
| <i>TOLLIP</i>    | -1.31           | 2.17             | <i>MLXIPL</i>    | -1.29           | 1.71             |
| <i>KLHDC7B</i>   | -1.32           | 1.63             | <i>KLHL17</i>    | -1.65           | 1.91             |
| <i>TOX2</i>      | -1.26           | 1.95             | <i>NRP1</i>      | -1.10           | 1.82             |
| <i>LRRK2</i>     | -1.18           | 1.86             | <i>TMEM130</i>   | -2.00           | 1.86             |
| <i>WDR4</i>      | -1.21           | 2.04             | <i>RTN4R</i>     | -1.17           | 1.58             |
| <i>RUNX1</i>     | -1.88           | 1.89             | <i>GJA3</i>      | -1.37           | 1.66             |
| <i>PLEKHA4</i>   | -1.08           | 2.09             | <i>NRN1</i>      | -1.19           | 2.33             |
| <i>ENPP1</i>     | -1.20           | 1.71             | <i>FAM83H</i>    | -2.16           | 1.67             |
| <i>C15orf48</i>  | -1.98           | 1.52             | <i>GAD1</i>      | -2.01           | 1.73             |
| <i>KRT86</i>     | -1.57           | 1.57             | <i>SLC25A29</i>  | -1.23           | 1.59             |
| <i>PLCH2</i>     | -1.63           | 1.90             | <i>SIX1</i>      | -1.18           | 1.77             |
| <i>ARID3A</i>    | -1.31           | 1.68             | <i>CA3</i>       | -1.11           | 1.63             |
| <i>TNFSF14</i>   | -1.94           | 2.18             | <i>SNIP</i>      | -1.14           | 1.81             |
| <i>GNA14</i>     | -1.10           | 2.06             | <i>LAMA1</i>     | -1.01           | 1.82             |
| <i>GJA3</i>      | -1.37           | 1.66             | <i>C1orf144</i>  | -1.17           | 1.43             |
| <i>EGFL6</i>     | -1.24           | 1.65             | <i>PNMA3</i>     | -1.26           | 1.75             |
| <i>KLHL17</i>    | -1.65           | 1.91             | <i>CIDEA</i>     | -2.05           | 1.69             |
| <i>PITX1</i>     | -1.40           | 1.70             | <i>KREMEN2</i>   | -1.22           | 1.83             |
| <i>MMP9</i>      | -1.61           | 1.82             | <i>OSR2</i>      | 1.04            | -1.58            |
| <i>PTPRZ1</i>    | -1.23           | 1.52             | <i>SLC8A1</i>    | -1.88           | 1.76             |
| <i>RTN4R</i>     | -1.17           | 1.58             | <i>OLFML2A</i>   | -1.04           | 1.83             |
| <i>TMEFF2</i>    | -1.17           | 1.60             | <i>PLL2</i>      | -1.05           | 1.45             |
| <i>SIRPA</i>     | -1.02           | 1.71             | <i>MAL</i>       | -1.87           | 1.74             |
| <i>FLJ40504</i>  | -1.68           | 1.74             | <i>FSCN1</i>     | -1.26           | 1.86             |
| <i>GAD1</i>      | -2.01           | 1.73             | <i>PHF21B</i>    | -1.38           | 1.75             |
| <i>EML2</i>      | -1.35           | 1.46             | <i>SLC2A13</i>   | -1.29           | 1.84             |
| <i>GATA2</i>     | -1.03           | 1.72             | <i>PKP3</i>      | -1.21           | 1.72             |
| <i>SLC1A3</i>    | -1.72           | 1.81             | <i>FBXL7</i>     | -1.03           | 1.79             |
| <i>UNC13A</i>    | -1.13           | 1.61             | <i>FLJ40504</i>  | -1.68           | 1.74             |
| <i>SLC25A29</i>  | -1.23           | 1.59             | <i>ONECUT2</i>   | -1.15           | 1.92             |
| <i>TUBB3</i>     | -1.10           | 2.13             | <i>TOX</i>       | -1.53           | 1.57             |
| <i>LAMA1</i>     | -1.01           | 1.82             | <i>IGF2BP3</i>   | -3.81           | 1.64             |
| <i>C6orf204</i>  | -1.24           | 1.65             | <i>CHRM2</i>     | -1.69           | 1.66             |
| <i>PELI3</i>     | -1.05           | 1.82             | <i>PXDNL</i>     | -4.76           | 2.00             |
| <i>ERBB4</i>     | -1.08           | 1.80             | <i>WDR4</i>      | -1.21           | 2.04             |
| <i>DCBLD1</i>    | -1.62           | 1.55             | <i>LOC389634</i> | -1.03           | 1.53             |
| <i>CHRM2</i>     | -1.69           | 1.66             | <i>PRKCZ</i>     | -1.12           | 1.69             |
| <i>ABCB1</i>     | -1.06           | 1.97             | <i>NSUN7</i>     | -1.09           | 1.68             |
| <i>NRP1</i>      | -1.10           | 1.82             | <i>SLC9A7</i>    | -2.20           | 1.34             |
| <i>LMNB2</i>     | -1.09           | 1.82             | <i>PRDM5</i>     | -1.11           | 1.66             |
| <i>RBM11</i>     | -1.01           | 1.97             | <i>KCNMA1</i>    | -1.92           | 1.56             |
| <i>PHF21B</i>    | -1.38           | 1.75             | <i>CD70</i>      | -1.22           | 1.37             |
| <i>SNX10</i>     | -2.56           | 1.62             | <i>TOX2</i>      | -1.26           | 1.95             |
| <i>DIP2C</i>     | -1.11           | 1.83             | <i>FZD5</i>      | -1.09           | 1.70             |
| <i>PCDHB12</i>   | -1.19           | 1.71             | <i>PRAME</i>     | -4.90           | 1.70             |
| <i>PPP1R14A</i>  | -1.22           | 1.61             | <i>TUBB3</i>     | -1.10           | 2.13             |
| <i>PCDHB7</i>    | -1.08           | 1.84             | <i>ERBB4</i>     | -1.08           | 1.80             |
| <i>CLYBL</i>     | -1.20           | 1.52             | <i>HS3ST2</i>    | -1.28           | 1.77             |
| <i>FLII</i>      | -1.11           | 1.77             | <i>RPS6KA4</i>   | -1.12           | 1.74             |
| <i>PCSK6</i>     | -1.26           | 1.84             | <i>TMEFF2</i>    | -1.17           | 1.60             |
| <i>PRKAG2</i>    | -1.26           | 1.52             |                  |                 |                  |
| <i>TAC1</i>      | -1.02           | 1.51             |                  |                 |                  |
| <i>MAL</i>       | -1.87           | 1.74             |                  |                 |                  |
| <i>NBLA00301</i> | -1.08           | 1.70             |                  |                 |                  |
| <i>CXXC4</i>     | -1.25           | 2.30             |                  |                 |                  |



**Table S4.** Top ranked pathways obtained from the 122 differentially methylated probes for the Grade 3 tumors. KOBAS and GSEA software were used for the enrichment analysis.

| <b>Enrichment for Pathway Identification</b> | <b>Database</b> | <b>Input number</b> | <b>p-value Kobas</b> | <b>p-value GSEA</b> |
|----------------------------------------------|-----------------|---------------------|----------------------|---------------------|
| ECM-receptor interaction                     | KEGG Pathway    | 5                   | 8.7E-05              | 3.7 E-05            |
| Cell migration                               | Reactome        | 8                   | 3.9 E-04             | 6.2 E-05            |
| Developmental Biology                        | Reactome        | 9                   | 1.2 E-03             | 2.1 E-05            |
| Arf6 signaling events                        | PID             | 3                   | 2.3 E-03             | 6.4 E-05            |
| L1CAM interactions                           | Reactome        | 4                   | 2.6 E-03             | 4.1 E-05            |

**Table S5.** Comparison between gene methylation pattern and transcript levels with clinical and pathologic parameters.

| <i>Gene</i>   | <i>Low Methylation levels</i> | <i>High expression levels</i> | <i>Prognosis</i>                     |
|---------------|-------------------------------|-------------------------------|--------------------------------------|
| <i>NKX2.3</i> | 0.014 <sup>a</sup>            |                               | <i>Shorter disease free survival</i> |
| <i>BDNF</i>   | 0.018 <sup>a</sup>            |                               | <i>Shorter disease free survival</i> |
|               | 0.035 <sup>b</sup>            |                               | <i>Lymph nodes metastasis</i>        |
| <i>FOXA1</i>  |                               | 0.033 <sup>b</sup>            | <i>Perineural invasion</i>           |
| <i>LIN28A</i> | 0.023 <sup>b</sup>            |                               | <i>Clinical stages III and VI</i>    |
| <i>CDX2</i>   | 0.041 <sup>b</sup>            |                               | <i>Clinical stages III and VI</i>    |
| <i>OTX2</i>   |                               | 0.040 <sup>b</sup>            | <i>Angiolymphatic invasion</i>       |

<sup>a</sup>Log rank test - univariate analysis

<sup>b</sup>Mann -Whitney test. - univariate analysis

**Table S6.** Top ranked functions and canonical pathways as identified by *in silico* analysis. Under- and overexpressed and hypermethylated genes were used as to input in the IPA, KOBAS and GSEA software.

| <b><i>Transcriptome Analysis</i></b>                       |                        |                           |
|------------------------------------------------------------|------------------------|---------------------------|
| <b>Functions Annotation</b>                                | <b>Number of Genes</b> | <b>p-value</b>            |
| Cellular movement                                          | 540                    | 1.28E-36 <sup>#</sup>     |
| Cell migration                                             | 493                    | 4.98E-35 <sup>+</sup>     |
| Embryonic development, cell development                    | 305                    | 5.2E-33 <sup>+</sup>      |
| Angiogenesis                                               | 271                    | 4.15E-29 <sup>#</sup>     |
| Cellular growth and proliferation                          | 802                    | 2.29E-27 <sup>+</sup>     |
| Cell cycle                                                 | 154                    | 3.12E-21 <sup>+</sup>     |
| Epithelial/mesenchymal transition                          | 55                     | 2.39E-7 <sup>+</sup>      |
| Extracellular matrix                                       | 33                     | 2.79E-7 <sup>+</sup>      |
| Stem cell proliferation                                    | 46                     | 3.75E-7 <sup>+</sup>      |
| Cell-to-cell Signaling and Interaction                     | 82                     | 1.27E-7 <sup>+</sup>      |
| <b>Canonical Pathways</b>                                  |                        |                           |
| Molecular mechanisms of cancer                             | 81                     | 2.09E-26 <sup>+</sup>     |
| Calcium signaling pathway                                  | 53                     | 8.79E-22 <sup>#</sup>     |
| MAPK signaling pathway                                     | 63                     | 9.14E-20 <sup>+</sup>     |
| Cell cycle, Mitotic                                        | 90                     | 2.81E-33 <sup>+</sup>     |
| <b><i>Genome-wide methylation</i></b>                      |                        |                           |
| <b>Functions Annotation</b>                                | <b>Number of Genes</b> | <b>p-value</b>            |
| Embryonic development, Organismal development              | 78                     | 5.2E-33 <sup>+</sup>      |
| DNA binding                                                | 72                     | 2.61E-21 <sup>+</sup>     |
| Cell development                                           | 25                     | 2.14E-20 <sup>+</sup>     |
| Gene expression                                            | 83                     | 4.36E-19 <sup>#</sup>     |
| Cell-to-cell Signaling and Interaction                     | 29                     | 5.62E-11 <sup>+</sup>     |
| Ion transport                                              | 4                      | 6.94E-04 <sup>#</sup>     |
| <b>Canonical Pathways</b>                                  |                        |                           |
| Transcriptional regulatory network in embryonic stem cells | 9                      | 2.45E-09 <sup>&amp;</sup> |
| MAPK signaling pathway                                     | 7                      | 2.23E-06 <sup>#</sup>     |
| Wnt/ $\beta$ -catenin Signaling                            | 8                      | 2.13E-03 <sup>&amp;</sup> |

<sup>+</sup> IPA Function annotation or Canonical Pathways were confirmed by KOBAS and GSEA software. <sup>#</sup> IPA Function annotation or Canonical Pathways were confirmed by KOBAS software. <sup>&</sup> Canonical Pathways obtained only from IPA software.

**Table S7.** Genes provided from the upstream regulator analysis (Ingenuity Pathways Analysis software - IPA). Genes in the first column were altered (under- or overexpressed) in PeCa and are known to regulate several genes identified as differentially expressed in the transcriptome analysis.

| <i>Upstream Regulator</i> | <i>Log Ratio</i> | <i>Molecule Type</i>              | <i>Predicted Activation State</i> | <i>Z-score</i> | <i>Drug(s)</i>                                    |
|---------------------------|------------------|-----------------------------------|-----------------------------------|----------------|---------------------------------------------------|
| <i>SRF</i>                | Down-expressed   | Transcription regulator           | Inhibited                         | -4.055         |                                                   |
| <i>SIRT1</i>              | Down-expressed   | Transcription regulator           | Inhibited                         | -4.003         |                                                   |
| <i>NUPR1</i>              | Down-expressed   | Transcription regulator           | Inhibited                         | -3.791         |                                                   |
| <i>MEF2C</i>              | Down-expressed   | Transcription regulator           | Inhibited                         | -3.134         |                                                   |
| <i>EPAS1</i>              | Down-expressed   | Transcription regulator           | Inhibited                         | -3.079         |                                                   |
| <i>ERG</i>                | Down-expressed   | Transcription regulator           | Inhibited                         | -2.910         |                                                   |
| <i>ARNT2</i>              | Down-expressed   | Transcription regulator           | Inhibited                         | -2.832         |                                                   |
| <i>MITF</i>               | Down-expressed   | Transcription regulator           | Inhibited                         | -2.614         |                                                   |
| <i>ZEB1</i>               | Down-expressed   | Transcription regulator           | Inhibited                         | -2.583         |                                                   |
| <i>SIM1</i>               | Down-expressed   | Transcription regulator           | Inhibited                         | -2.545         |                                                   |
| <i>TBX5</i>               | Down-expressed   | Transcription regulator           | Inhibited                         | -2.499         |                                                   |
| <i>ATF3</i>               | Down-expressed   | Transcription regulator           | Inhibited                         | -2.495         |                                                   |
| <i>TGFB3</i>              | Down-expressed   | Growth factor                     | Inhibited                         | -2.494         |                                                   |
| <i>NOTCH4</i>             | Down-expressed   | Transcription regulator           | Inhibited                         | -2.378         |                                                   |
| <i>ESR1</i>               | Down-expressed   | Ligand-dependent nuclear receptor | Inhibited                         | -2.367         | 17-alpha-ethinylestradiol, fulvestrant, tamoxifen |
| <i>NPPA</i>               | Down-expressed   | Other                             | Inhibited                         | -2.051         |                                                   |
| <i>MERTK</i>              | Down-expressed   | Kinase                            | Inhibited                         | -2.011         |                                                   |
| <i>FOXM1</i>              | Overexpressed    | Transcription regulator           | Activated                         | 2.004          |                                                   |
| <i>TLR6</i>               | Overexpressed    | Transmembrane receptor            | Activated                         | 2.034          |                                                   |
| <i>S100A9</i>             | Overexpressed    | Other                             | Activated                         | 2.044          |                                                   |
| <i>OSM</i>                | Overexpressed    | Cytokine                          | Activated                         | 2.089          |                                                   |
| <i>F2RL1</i>              | Overexpressed    | G-protein coupled Receptor        | Activated                         | 2.183          |                                                   |
| <i>PTGES</i>              | Overexpressed    | Enzyme                            | Activated                         | 2.195          |                                                   |
| <i>PIK3CD</i>             | Overexpressed    | Kinase                            | Activated                         | 2.204          | SF 1126, PX-866, NVP-BEZ235, BKM120               |
| <i>PLAU</i>               | Overexpressed    | Peptidase                         | Activated                         | 2.476          |                                                   |
| <i>EZH2</i>               | Overexpressed    | Transcription regulator           | Activated                         | 2.503          |                                                   |
| <i>CASP1</i>              | Overexpressed    | Peptidase                         | Activated                         | 2.589          |                                                   |
| <i>FGF1</i>               | Overexpressed    | Growth factor                     | Activated                         | 2.672          | pentosan polysulfate                              |
| <i>E2F2</i>               | Overexpressed    | Transcription regulator           | Activated                         | 2.688          |                                                   |
| <i>TFDP1</i>              | Overexpressed    | Transcription regulator           | Activated                         | 2.804          |                                                   |
| <i>CCL5</i>               | Overexpressed    | Cytokine                          | Activated                         | 2.940          |                                                   |
| <i>S100A7</i>             | Overexpressed    | Other                             | Activated                         | 2.985          |                                                   |
| <i>STAT1</i>              | Overexpressed    | Transcription regulator           | Activated                         | 3.009          |                                                   |
| <i>IL1A</i>               | Overexpressed    | Cytokine                          | Activated                         | 3.158          | IL-1 trap                                         |
| <i>E2F1</i>               | Overexpressed    | Transcription regulator           | Activated                         | 3.579          |                                                   |
| <i>IL1B</i>               | Overexpressed    | Cytokine                          | Activated                         | 4.011          | IL-1 trap, canakinumab                            |
| <i>TP63</i>               | Overexpressed    | Transcription regulator           | Activated                         | 4.132          |                                                   |
| <i>IFNG</i>               | Overexpressed    | Cytokine                          | Activated                         | 4.839          |                                                   |
| <i>TNF</i>                | Overexpressed    | Cytokine                          | Activated                         | 6.014          | adalimumab, etanercept, infliximab, golimumab     |
| <i>CSF2</i>               | Overexpressed    | Cytokine                          | Activated                         | 6.342          |                                                   |

**Table S8.** Clinical and pathological characteristics of the penile carcinomas patients.

| Variable                                 | Number of Patients (%)<br>N=44 |
|------------------------------------------|--------------------------------|
| <i>Age (years)</i>                       |                                |
| ≤ 45                                     | 10 (22.7)                      |
| > 45                                     | 34 (77.3)                      |
| Average age                              | 57.1 years                     |
| Min age                                  | 24 years                       |
| Max age                                  | 92 years                       |
| <i>Smoking usage</i>                     |                                |
| Yes                                      | 12 (27.3)                      |
| No                                       | 28 (63.6)                      |
| NA                                       | 4 (9.1)                        |
| <i>Alcohol consumption</i>               |                                |
| Yes                                      | 7 (15.9)                       |
| No                                       | 30 (68.2)                      |
| NA                                       | 7 (15.9)                       |
| <i>Histological type<sup>&amp;</sup></i> |                                |
| SCC usual/classical                      | 41 (93.2)                      |
| SCC mixed*                               | 3 (6.8)                        |
| <i>Clinical Stage</i>                    |                                |
| I                                        | 12 (27.3)                      |
| II                                       | 13 (29.5)                      |
| III                                      | 13 (29.5)                      |
| IV                                       | 6 (13.7)                       |
| <i>Histological grade</i>                |                                |
| I                                        | 9 (20.5)                       |
| II                                       | 22 (50.0)                      |
| III                                      | 13 (29.5)                      |
| <i>Lymph node metastasis</i>             |                                |
| Yes                                      | 12 (27.3)                      |
| No                                       | 14 (31.8)                      |
| NL                                       | 18 (40.9)                      |
| <i>HPV infection</i>                     |                                |
| High risk (16/18/31/33)                  | 17 (38.6)                      |
| No                                       | 27 (61.4)                      |
| <i>Perineural invasion</i>               |                                |
| Yes                                      | 10 (22.7)                      |
| No                                       | 34 (77.3)                      |
| <i>Type of surgery</i>                   |                                |
| Partial penectomy                        | 37 (84.1)                      |
| Total penectomy                          | 7 (15.9)                       |

NA: data not available

NL: Lymphadenectomy was not performed

SCC: squamous cell carcinoma

<sup>&</sup> Histopathological classification was performed according to the International Union Against Cancer (TNM, 2002). SCC mixed\* (one SCC usual/sarcomatoid and two SCC usual/papillary)

**Table S9.** Primer sequences and probe properties for those evaluated by pyrosequencing.

| Gene symbol    | Primer sequences                                | Amplicon length | Number of CpG |
|----------------|-------------------------------------------------|-----------------|---------------|
| <i>CDI33</i>   | F - 5' TGTTAGAGAGAAGGGGTTTGGAG 3'               | 280 bp          | 5             |
|                | R - 5' [B]ACCCCTAACTTAAAACACCTTCCC 3'           |                 |               |
|                | Seq - 5' TAGTTTTTATTTAG 3'                      |                 |               |
| <i>FOXAI</i>   | Py - 5' CGATAGTCGCGGGTTTTGCGGT 3'               | 191 bp          | 5             |
|                | F - 5' TTTAGTTGTGGGGAGGATGG 3'                  |                 |               |
|                | R - 5' [B]CACCTACAATCCTCACTAC 3'                |                 |               |
| <i>LIN28A</i>  | Seq - 5' TGTTGTGTTAAGA 3'                       | 237 bp          | 5             |
|                | Py - 5' CGGGTTTGCATAGTTGGGGCGGTTTAGGTCGCG 3'    |                 |               |
|                | F - 5' GGGTTAGGAATTTGGTGTT 3'                   |                 |               |
| <i>TWIST1</i>  | R - 5' [B]CCAACCCACAAATAAACAAAC 3'              | 293 bp          | 5             |
|                | Seq - 5' GGGTATTATTGTTT 3'                      |                 |               |
|                | Py - 5' CGGTGTACGTTAGGGGAACGCGGGAGGCG 3'        |                 |               |
| <i>MEIS1</i>   | F - 5' AGAGTTGGGGTTTAGGAGGT 3'                  | 425 bp          | 3             |
|                | R - 5' [B]TACCCTCAAATCCCCTCT 3'                 |                 |               |
|                | Seq - 5' TTTGTAATGTT 3'                         |                 |               |
| <i>WIT1</i>    | 5' Py - CGAGTTTTTTCGAGGAAAAGATCGTTAGGGCGACG 3'  | 356 bp          | 4             |
|                | F - 5' GAATTGGATAATTTGGTAAGAG 3'                |                 |               |
|                | R - 5' [B]TACTACCTTCCTTACACCTTTC 3'             |                 |               |
| <i>PAX7</i>    | Seq - 5' AATGTTTTTGTATA 3'                      | 137 bp          | 2             |
|                | Py - 5' CGGATAATTGGTTCGGGATAAGATTTTCGG 3'       |                 |               |
|                | F - 5' GGTATTGGGGAAAAGAGGTGGT 3'                |                 |               |
| <i>HOXA3</i>   | R - 5' [B]TTCACCCCTCCTCCCAA 3'                  | 269 bp          | 3             |
|                | Seq - 5' GTATTAGTTATAAGT 3'                     |                 |               |
|                | Py - 5' CGGGCGTATTTTCGATCGG 3'                  |                 |               |
| <i>ONECUT1</i> | F - 5' AGAGGGGTAYGGTAATGTTTAAA 3'               | 332 bp          | 4             |
|                | R - 5' [B]AACCTTTTCCAACCAAAAAC 3'               |                 |               |
|                | Seq - 5' AGAGGGGTAYGGTAATGTTTAAA 3'             |                 |               |
| <i>ONECUT2</i> | Py - 5' CGAGAAGAAAGAGTTGATTTGTAAAGCG 3'         | 432 bp          | 3             |
|                | F - 5' GGTAGGGGAGAGGTAAGAG 3'                   |                 |               |
|                | R - 5' [B]CCAAACCAACCRAAAACC 3'                 |                 |               |
| <i>LHX5</i>    | Seq - 5' ATTTTTTTTGAAT 3'                       | 476 bp          | 4             |
|                | Py - 5' CGAGATTTAAGTTTGTAGTTATAAATTATCGAGACG 3' |                 |               |
|                | F - 5' GGAGGGGGTTATAGTAGTTAG 3'                 |                 |               |
| <i>NKX2.2</i>  | R - 5' [B]CAAATTACCTACTCCAAAACCTC 3'            | 430 bp          | 3             |
|                | Seq - 5' TGTTAGAGTATTTG 3'                      |                 |               |
|                | Py - 5' CGAGGAATATTTGCGTGCGATTTTACG 3'          |                 |               |
| <i>LHX5</i>    | F - 5' GTTTGGGGAGGGGAGTT 3'                     | 432 bp          | 3             |
|                | R - 5' [B]CCAACTACCAAATTCCTTCTAATCC 3'          |                 |               |
|                | Seq - 5' GTAGTTAGTAGAGAG 3'                     |                 |               |
| <i>LHX5</i>    | Py - 5' CGATAATAATAGCGGCGG 3'                   | 476 bp          | 4             |
|                | F - 5' GAGGGAGTTAGGAGTGAGTT 3'                  |                 |               |
|                | R - 5' [B]ACTTCTACCCAAAAAAC 3'                  |                 |               |
| <i>NKX2.2</i>  | Seq - 5' TGGTGGGTGGGT 3'                        | 430 bp          | 3             |
|                | Py - 5' CGGGCGGGGCGGTTTTGGCGT 3'                |                 |               |
|                | F - 5' GGGTATATGTTAGGATTTGATA 3'                |                 |               |
| <i>NKX2.2</i>  | R - 5' [B]CCTAAAAAACCCAAATCTC 3'                | 430 bp          | 3             |
|                | Seq - 5' GTTAAATTGAATA 3'                       |                 |               |
|                | Py - 5' CGAATTGTGGTTTCGGGTACG 3'                |                 |               |

Cont.

| Gene symbol   | Primer sequences                                      | Amplicon length | Number of CpG |
|---------------|-------------------------------------------------------|-----------------|---------------|
| <i>NKX2.3</i> | F - 5' AGGGATTTAGTAGTGGGTTTTTAG 3'                    | 202 bp          | 4             |
|               | R - 5' [B]TCCTACCCCAACCAAACTC 3'                      |                 |               |
|               | Seq - 5' AGGGATTTAGTAGTGGGTTTTTAG 3'                  |                 |               |
|               | Py - 5' <b>CGGGTTTTGTTTTGGCGTCGGGGTTGTAGATATCG</b> 3' |                 |               |
| <i>SOX3</i>   | F - 5' GAGTGGGAATGAGAAGTTATTT 3'                      | 226 bp          | 2             |
|               | R - 5' [B]ACCCAACATACAAAAATCCC 3'                     |                 |               |
|               | Seq - TATTATTTTAGTTT 3'                               |                 |               |
| <i>SOX14</i>  | Py - 5' <b>CGTGGAAAGGTGGGGAATTAACG</b> 3'             | 207 bp          | 4             |
|               | F - 5' TTGGTTTGTTYGTGGGGT 3'                          |                 |               |
|               | R - 5' [B]AAACRCCRTTCTAATAACCCA 3'                    |                 |               |
|               | Seq - 5' ATTTTTTGTGGATTT 3'                           |                 |               |
| <i>SOX17</i>  | Py - 5' <b>CGCGTAGTTTAGTTCGAGCG</b> 3'                | 369 bp          | 3             |
|               | F - 5' GTTGTTTTATTTGGGAGGTG 3'                        |                 |               |
|               | R - [B]ACCCCTAAATAACCAAAACAAA 3'                      |                 |               |
|               | Seq - 5' GATTGTTTTTTAG 3'                             |                 |               |
| <i>CDX2</i>   | Py - 5' <b>CGTTAATTCGGATTGTTTAGGTGTTTACG</b> 3'       | 320 bp          | 1             |
|               | F - 5' TGGGAGTTAGGATTTGGGAGT 3'                       |                 |               |
|               | R - 5' [B]TCTTTCCCAACCCTCAAC 3'                       |                 |               |
|               | Seq - 5' TAGTTTTTAAAGGG 3'                            |                 |               |
| <i>RSPO2</i>  | Py - 5' <b>CGTTTTG</b> 3'                             | 187 bp          | 3             |
|               | F - 5' GTAGGTGGTGTGTGGTTTAAG 3'                       |                 |               |
|               | R - 5' [B]TCCCAACTACTCTTTATCTATCCC 3'                 |                 |               |
|               | Seq - 5' GTTTTAAAGTTAGAAA 3'                          |                 |               |
| <i>OTX2</i>   | Py - 5' <b>CGTTTCGGTTTTTTTGAGGTTTTAAAGAACG</b> 3'     | 162 bp          | 3             |
|               | F - 5' GTTTTAGTGTGAGTTAGGG 3'                         |                 |               |
|               | R - 5' [B]ACAATATCTCTCCCTAACAC 3'                     |                 |               |
|               | Seq - 5' AGGTTAGATGGGAGG 3'                           |                 |               |
| <i>BDNF</i>   | Py - 5' <b>CGTGTATTTTTTGGGGAGTTCGTAAAGTTTTTCG</b> 3'  | 378 bp          | 4             |
|               | F - 5' TAGTAGGGAGGGGTGG 3'                            |                 |               |
|               | R - 5' [B]TCATAACTTCATTCAACTCAACC 3'                  |                 |               |
|               | Seq - 5' GAATATTTGTATG 3'                             |                 |               |
|               | Py - 5' <b>CGTCGAAGCGCGAA</b> 3'                      |                 |               |

F: forward primer; R: reverse primer; Seq: sequencing primer; Py: reference sequence (CGs in bold are the CpG sites analyzed by pyrosequencing); bp: base pair.

**Table S10.** Primer sequences and transcript properties for those evaluated by RT-qPCR.

| <b>Gene symbol</b>      | <b>Accession number</b>                                                                                              | <b>Primer sequences</b>                                              | <b>Amplicon length</b> |
|-------------------------|----------------------------------------------------------------------------------------------------------------------|----------------------------------------------------------------------|------------------------|
| <i>ACTB</i> *           | NM_001101.3                                                                                                          | F - 5'TTCCTGGGCATGGAGTC3'<br>R - 5'CAGGTCTTTGCGGATGTC3'              | 84bp                   |
| <i>GAPDH</i> *          | NM_002046<br>NM_001256799.1                                                                                          | F - 5'TGCACCACCAACTGCTTAG3'<br>R - 5'GAGGCAGGGATGATGTTC3'            | 176bp                  |
| <i>GUSB</i> *           | NM_000181.3                                                                                                          | F - 5'GAAAATACGTGGTTGGAGAGCTCATT3'<br>R - 5'CCGAGTGAAGATCCCCTTTTAA3' | 101bp                  |
| <i>HMBS</i> *           | NM_000190.3 NM_001258208.1<br>NM_001258209.1                                                                         | F - 5'GGCAATGCGGCTGCAA3'<br>R - 5'GGGTACCCACGCGAATCAC3'              | 64bp                   |
| <i>HPRT1</i> *          | NM_000194.2                                                                                                          | F - 5'TCATTATGCTGAGGATTTGGAAAG3'<br>R - 5'GGCTCCCATCTCCTTCATC3'      | 101bp                  |
| <i>RPLP0</i> *          | NM_001002.3<br>NM_053275.3                                                                                           | F - 5'GGAGACGGATTACACCTTC3'<br>R - 5'TTCAACCTTAGCTGGGG3'             | 139bp                  |
| <i>FOXA1</i>            | NM_004496.3                                                                                                          | F - 5'AGATGGAAGGGCATGAAACCA3'<br>R - 5'GCCTGAGTTCATGTTGCTGAC3'       | 95bp                   |
| <i>HOXA3</i>            | NM_030661.4<br>NM_153631.2                                                                                           | F - 5'ACAAAGCAGAAAACCAGCAGC3'<br>R - 5'GGCACAGGTAGCGGTTGAAG3'        | 157bp                  |
| <i>MEIS1</i>            | NM_002398.2                                                                                                          | F - 5'GGGAATTAGAGCACCAGGACC3'<br>R - 5'GCTGTCCCATACTCACACCC3'        | 179bp                  |
| <i>RSPO2</i>            | NM_178565.4                                                                                                          | F - 5'CCATGGAATGTGTGGAAGGATG3'<br>R - 5'TTCTGGTTCCAGACCCCAT3'        | 105bp                  |
| <i>PAX7</i>             | NM_002584.2<br>NM_013945.2 NM_001135254.1                                                                            | F - 5'GTCAGCAACGGCCTGTCT3'<br>R - 5'TCTCCTGGCTTGATGGAGTC3'           | 170bp                  |
| <i>PROM1/<br/>CD133</i> | NM_006017.2 NM_001145847.1<br>NM_001145848.1<br>NM_001145849.1<br>NM_001145850.1<br>NM_001145851.1<br>NM_001145852.1 | F - 5'AGCTGATGTTGAAACTGCTTGAG3'<br>R - 5'CTGGCGTTGCTCCTGGATTT3'      | 110bp                  |
| <i>SOX3</i>             | NM_005634.2                                                                                                          | F - 5'TATAGCCAGGTGTGCGTGTG3'<br>R - 5'AAGTAGCCCCTCCCCACTAC3'         | 158bp                  |
| <i>SOX14</i>            | NM_004189.3                                                                                                          | F - 5'GTCGGGTTATGAAAGTCAGGAAGT3'<br>R - 5'CAAATGAACAGAGCAACGAGGT3'   | 136bp                  |
| <i>SOX17</i>            | NM_022454.3                                                                                                          | F - 5'AAGTAGAAGGGGATGTCCAAGT3'<br>R - 5'TTAAACCCAGCGATGCTTGC3'       | 136bp                  |

Cont.

| <b>Gene symbol</b>    | <b>Accession number</b>                                                          | <b>Primer sequences</b>                                          | <b>Amplicon length</b> |
|-----------------------|----------------------------------------------------------------------------------|------------------------------------------------------------------|------------------------|
| <i><b>TWIST1</b></i>  | NM_001753.4                                                                      | F - 5'ACCTAGATGTCATTGTTCCAGAG3'<br>R - 5'CCACGCCCTGTTTCTTTGAAT3' | 143bp                  |
| <i><b>ONECUT1</b></i> | NM_004498.1                                                                      | F - 5'CCCAAACCTGGAGCAAAC3'<br>R - 5'GTTGCCTCTATCCTTCCCATGT3'     | 150bp                  |
| <i><b>OTX2</b></i>    | NM_021728.3<br>NM_001270525.1<br>NM_001270524.1<br>NM_001270523.1<br>NM_172337.2 | F - 5'CTTCATGCGAGAGGAGGTGG3'<br>R - 5'TCTGCTGTTGTTGCTGTTGT3'     | 110bp                  |

F: forward primer; R: reverse primer; bp: base pair.

\*: Candidates for reference transcripts.
